# Supplementary material
Source: Royal Society of Chemistry journal article supplement (doi:10.1039/d6cc01252c)
Supplement: d6cc01252c5.pdf [file d6cc01252c5.pdf]

*Supplementary Information*

**Factors maximising photoinduced electron-transfer-coupled phase migration to boost biphasic photocatalysis**

*Ren Itagaki,<sup>a</sup> Akinobu Nakada,<sup>a\*</sup> Hajime Suzuki,<sup>a,b</sup> Osamu Tomita,<sup>a</sup> Ryu Abe<sup>a\*</sup>*

<sup>a</sup> Department of Energy and Hydrocarbon Chemistry, Graduate School of Engineering, Kyoto University, Nishikyo-ku, Kyoto 615-8510, Japan.

<sup>b</sup> Precursory Research for Embryonic Science and Technology (PRESTO), Japan Science and Technology Agency (JST), 4-1-8 Honcho, Kawaguchi, Saitama 332-0012, Japan.

\*E-mail: nakada@scl.kyoto-u.ac.jp (A.N.), ryu-abe@scl.kyoto-u.ac.jp (R.A.)  
Phone: +81-75-383-7044. Fax: +81-75-383-2479.

## General procedure

<sup>1</sup>H NMR (400 MHz) spectra were measured on a JEOL ECX-400 spectrometer. UV-vis absorption and emission spectra were recorded at room temperature on Shimadzu U1800 and a JASCO Model FP-8550 spectrofluorometer, respectively. Emission lifetimes were measured on a Horiba DeltaFlex (excitation source: NanoLED-440L). Elemental analyses were carried out on a PerkinElmer 2400 II CHN analyser.

## Synthesis and characterisation

[Ir(C6)<sub>2</sub>(dmb)]PF<sub>6</sub> (**Ir**) was synthesized according to a slightly modified literature procedure.<sup>1</sup> An Ir(III)  $\mu$ -chloro-bridged dimer complex, which was used as a precursor for the target complex **Ir** was synthesized as previously reported.<sup>2</sup> A suspension of the dimer complex (0.104 g, 0.056 mmol) and dmb (0.023 g, 0.125 mmol) in ethylene glycol (5.6 mL) was stirred for 2 h at 150 °C under a nitrogen atmosphere. After cooling to room temperature, the reaction mixture was poured into water (40 mL) and NH<sub>4</sub>PF<sub>6</sub> (0.407 g, 2.497 mmol in 4 mL of water) was added. The resulting precipitate was extracted into CH<sub>2</sub>Cl<sub>2</sub> (2 × 50 mL), before the organic phase was separated, dried over MgSO<sub>4</sub>, and filtered. After all volatiles had been removed from the filtrate under reduced pressure, the obtained crude product was purified by column chromatography on silica gel (methanol/CH<sub>2</sub>Cl<sub>2</sub> = 5:95, v/v), followed by recrystallisation from CH<sub>2</sub>Cl<sub>2</sub>/*n*-hexane, which afforded **Ir** as red crystals (0.086 g, 0.068 mmol, 63% yield). <sup>1</sup>H NMR (400 MHz, acetone-*d*<sub>6</sub>):  $\delta$  8.85 (d, *J* = 6.0 Hz, 2H), 8.53 (s, 2H), 8.08 (d, *J* = 8.5 Hz, 2H), 7.77 (d, *J* = 5.0 Hz, 2H), 7.31 (t, *J* = 7.2 Hz, 2H), 7.02 (t, *J* = 7.2 Hz, 2H), 6.42 (d, *J* = 3.5 Hz, 2H), 6.17 (d, *J* = 9.5 Hz, 2H), 6.10-6.07 (m, 4H), 3.40 (q, *J* = 7.7 Hz, 6H), 2.60 (s, 6H), 1.06 (t, *J* = 7.3 Hz, 12H). Anal. Calcd. for C<sub>52</sub>H<sub>46</sub>F<sub>6</sub>IrN<sub>6</sub>O<sub>4</sub>PS<sub>2</sub>·0.5CH<sub>2</sub>Cl<sub>2</sub>: C, 49.91; H, 3.75; N, 6.65. Found: C, 49.80; H, 3.67; N, 6.59.

Ferrocenium hexafluorophosphate (Fc<sup>+</sup>PF<sub>6</sub><sup>-</sup>) was synthesized from Fc according to a previously reported procedure.<sup>3</sup> The yield was 91% (4.55 g). Anal. Calcd for C<sub>10</sub>H<sub>10</sub>F<sub>6</sub>PFe: C, 36.29; H, 3.05; N, 0.00; found: C, 36.27; H, 2.79; N, 0.02. UV-vis absorption:  $\lambda_{\max}$  = 618 nm ( $\epsilon_{\max}$  = 420 M<sup>-1</sup> cm<sup>-1</sup>). An aqueous solution of ferrocenium chloride (Fc<sup>+</sup>Cl<sup>-</sup>) was prepared by an ion-exchange method. Fc<sup>+</sup>PF<sub>6</sub><sup>-</sup> was dissolved in an aqueous TBACl solution (1 equiv, pH 2.5 adjusted with HCl) under an Ar atmosphere to avoid decomposition by O<sub>2</sub>.<sup>4-6</sup> The resulting blue suspension was filtered to remove precipitated TBAPF<sub>6</sub>. UV-vis absorption:  $\lambda_{\max}$  = 618 nm ( $\epsilon_{\max}$  = 420 M<sup>-1</sup> cm<sup>-1</sup>).

## Emission-quenching measurements

Emission spectrum of **Ir** (0.25  $\mu$ M) in an organic solution was measured upon excitation at  $\lambda$  = 480 nm in a septum-sealed Pyrex cell (10 mm × 10 mm) after sparging with Ar (> 99.999%) for 20 min in the absence or presence of Fc at various concentrations ([Fc]; 0–0.3 mM). The emission intensity decreased as the concentration of Fc was increased, indicating the occurrence of photoinduced electron transfer from Fc to excited **Ir**. The reductive quenching followed the Stern-Volmer equation<sup>7</sup> (Eq. S1).

$$I_0/I = k_q \tau_0 [\text{Fc}] + 1 \quad (\text{S1a})$$

$$\eta_q = 100 \times (1 - 1/(1 + k_q \tau_0 [\text{Fc}])) \quad (\text{S1b})$$

where  $I_0$  and  $I$  are emission intensity at 590 nm in the absence and presence of quencher, respectively.

### Electrochemical measurements

Cyclic voltammetry measurements were conducted on a BAS model 650A electrochemical analyser, using a glassy carbon working electrode ( $\phi = 3$  mm) and a platinum-wire counter electrode. The reference electrode was made of a silver wire, inserted into a small glass tube fitted with a porous Vycor frit at the tip, and filled with a MeCN solution containing 0.1 M TBAPF<sub>6</sub> and 0.01 M AgNO<sub>3</sub>. Unless otherwise noted, 0.1 M TBAPF<sub>6</sub> was used as the supporting electrolyte; for MeCN/H<sub>2</sub>O (1:1, v/v) mixed solutions, 0.1 M TEABF<sub>4</sub> was used instead due to its higher solubility in the mixed solvent. The cyclic voltammetry measurements were carried out at 298 K using Fc (0.5 mM) and electrolyte (0.1 M), with scan rates ( $\nu$ ) of 50–200 mV s<sup>-1</sup>.

The anodic peak current ( $I_p$ ) of Fc increased linearly with the square root of the scan rate ( $\nu^{1/2}$ ), and plots of  $I_p$  versus  $\nu^{1/2}$  gave straight lines for each solvent. The diffusion coefficient ( $D$ ) of Fc in each solvent was estimated from the slopes of the Randles–Sevcik plots using Eq. S2.

$$I_p = 0.4463n^{3/2}F^{3/2}A[\text{Fc}](RT)^{-1/2}\nu^{1/2}D^{1/2} \quad (\text{S2})$$

where  $n$  is the number of electrons,  $F$  is Faraday's constant,  $A$  is the working-electrode area,  $[\text{Fc}]$  is the concentration of Fc,  $R$  is the gas constant, and  $T$  is absolute temperature.

When  $D$  was plotted against the reciprocal viscosity ( $\mu^{-1}$ ) of the solvents, an approximately linear relationship was obtained. This dependence is consistent with the Stokes–Einstein equation (Eq. S3), suggesting that specific-solvation effects of Fc are minor and that the diffusion process is governed mainly by the bulk viscosity of the medium (Fig. S2f).

$$D = k_B T / (6\pi r \mu) \quad (\text{S3})$$

where  $k_B$  is Boltzmann's constant,  $T$  is absolute temperature, and  $r$  is radius of molecule. These electrochemical data provide the diffusion coefficients of Fc in the organic solvents used in the biphasic photocatalytic experiments.

### Photocatalytic reactions

A solution of Fc (5.0 mM), Ir (0.05 mM), and Bn-Br (50 mM) in an organic solution (1.0 mL) was placed in a test tube (inner diameter: 10 mm; volume: 8.4 mL), before water was added (1.0 mL). The partition coefficient of each component was estimated based on the absorption spectra before photoirradiation. The biphasic solution was degassed by Ar sparging (10 min) and irradiated at  $\lambda = 470$  nm using an LED lamp (CL-H1-470-9-1, Asahi Spectra Co.) with vigorous stirring. The product of the aqueous phase, i.e., Fc<sup>+</sup> was analysed by UV-vis absorption spectra in a quartz cell (1 mm × 10 mm), while the organic phase, i.e., Bn<sub>2</sub>, was analysed and quantified by high performance liquid chromatography (Fig. S5). HPLC analyses were performed using a Shimadzu LC-20AD system equipped with a Phenomenex column (250 × 4.6 mm, 4 μm). A MeCN/H<sub>2</sub>O (80:20, v/v) solution was used as the eluent at a flow rate of 1.0 mL min<sup>-1</sup> (column temperature: 313 K), and a Shimadzu SPD-10A was used as the UV-vis detector. Under these analytical conditions, the retention times were determined using purchased or as-prepared samples (Fig. S7).

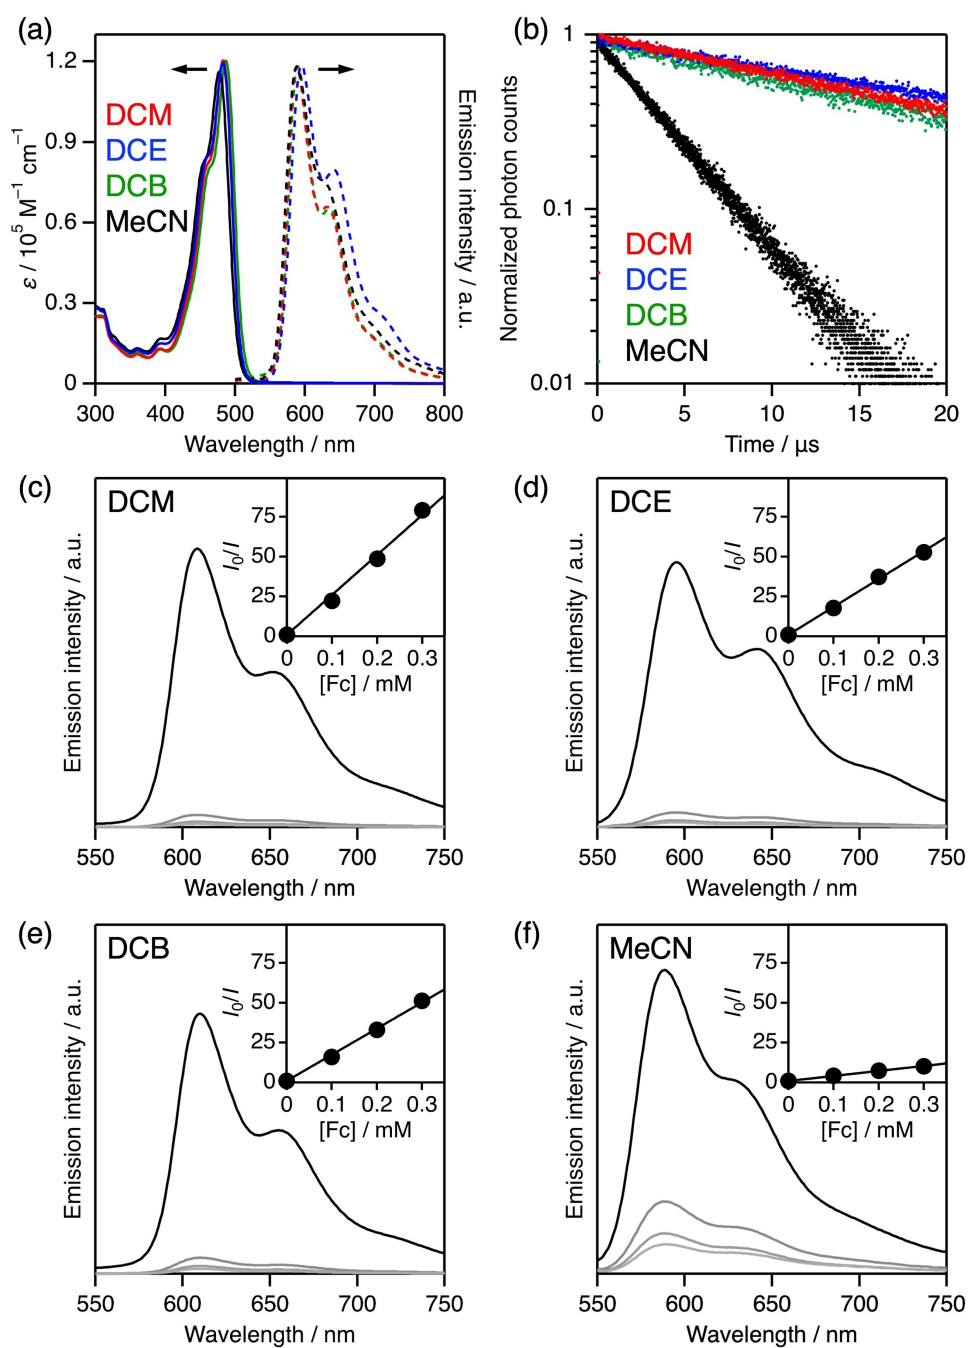

**Fig. S1** (a) Steady-state UV-visible absorption and emission spectra ( $\lambda_{\text{ex}} = 480 \text{ nm}$ ), and (b) emission decay ( $\lambda_{\text{ex}} = 440 \text{ nm}$ ;  $\lambda_{\text{em}} = 590 \text{ nm}$ ) of **Ir** in DCM, DCE, DCB, and MeCN solutions. Emission spectra of **Ir** in the presence of various concentrations of Fc (0–0.3 mM) in (c) DCM, (d) DCE, (e) DCB, and (f) MeCN solutions. Inset: Stern-Volmer quenching of **Ir** by Fc.

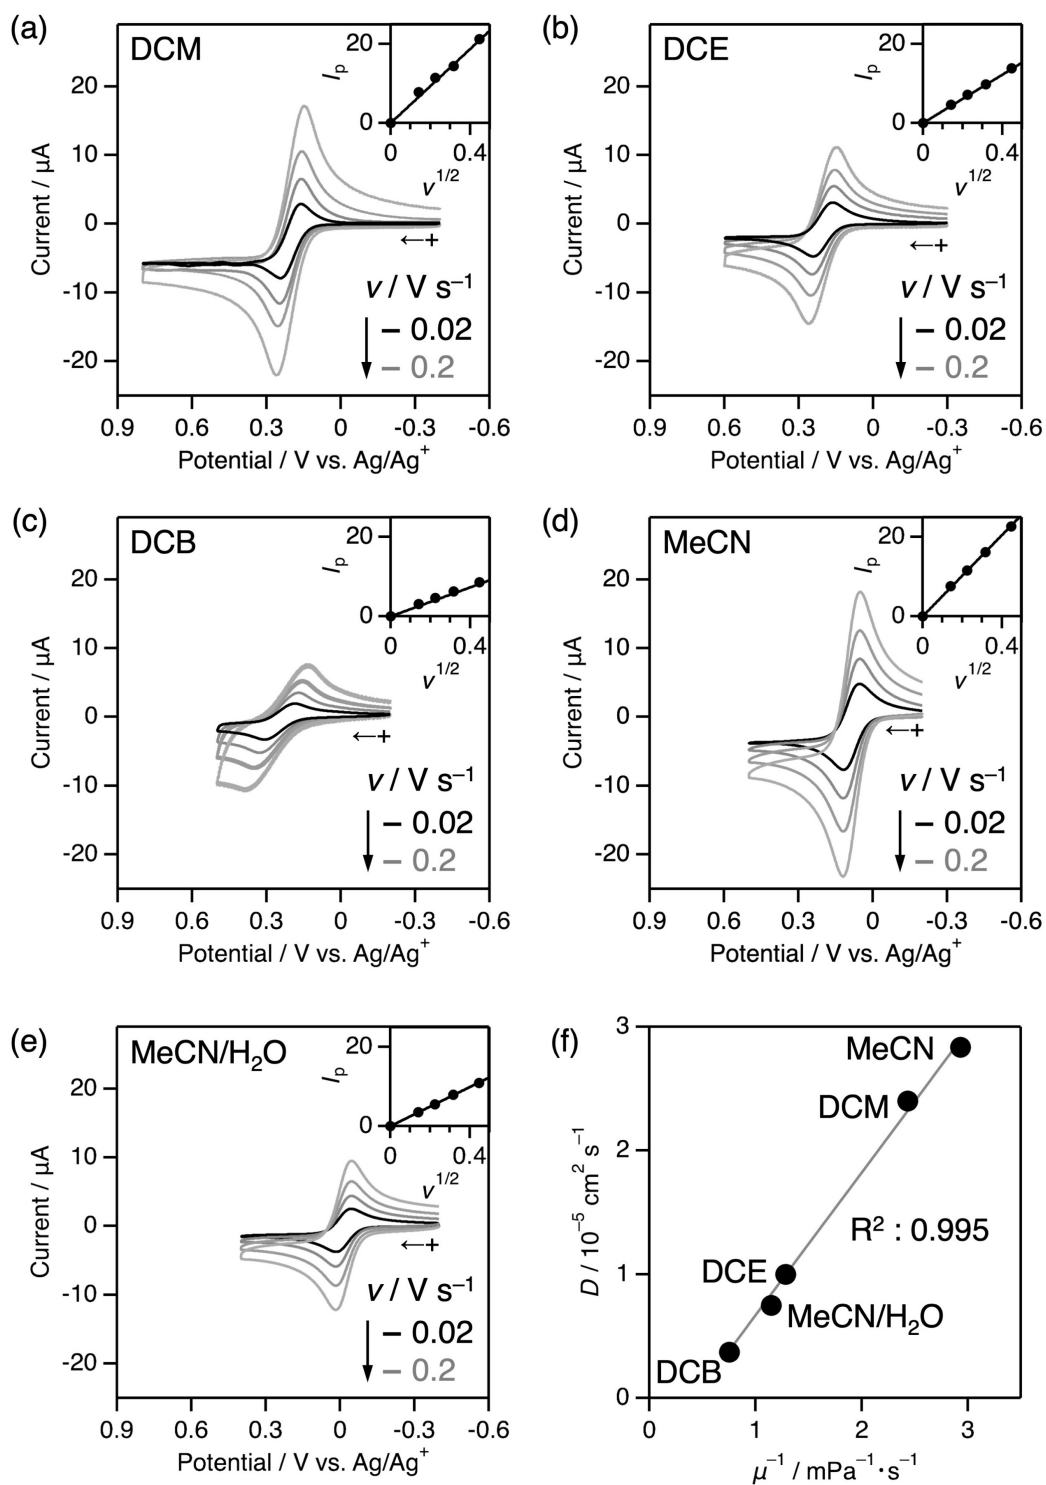

**Fig. S2** Cyclic voltammograms of Fc in (a) DCM, (b) DCE, (c) DCB, (d) MeCN, and (e) MeCN/H<sub>2</sub>O recorded at different scan rates. Inset: Randles–Sevcik plots. (f) Relationship between the diffusion coefficient ( $D$ ) of Fc and the reciprocal viscosity ( $\mu^{-1}$ ) of the solvents.

**Table S1**  $^1\text{H}$  NMR integration data and calculated amounts/concentrations of organic solvents dissolved in the  $\text{D}_2\text{O}$ -rich phase after stirring<sup>a</sup>

| Organic solvent | $[(\text{NH}_4)_2\text{SO}_4]$ in $\text{D}_2\text{O}$ / M | $\delta_{\text{org}}^b$ | Integration (Number of H) <sup>c</sup> | Organic solvent dissolved in $\text{D}_2\text{O}$ Amount / $\mu\text{mol}^d$ | Concentration / $\text{M}^e$ |
|-----------------|------------------------------------------------------------|-------------------------|----------------------------------------|------------------------------------------------------------------------------|------------------------------|
| DCM             | 0                                                          | 5.44                    | 10.69 (2H)                             | 32.1                                                                         | 0.06                         |
| DCM             | 2.0                                                        | 5.44                    | 1.98 (2H)                              | 5.94                                                                         | 0.01                         |
| DCE             | 0                                                          | 3.83                    | 6.49 (4H)                              | 9.74                                                                         | 0.02                         |
| DCE             | 2.0                                                        | 3.83                    | 1.42 (4H)                              | 2.13                                                                         | 0.004                        |
| DCB             | 0                                                          | 7.55, 7.30              | 0.10 <sup>f</sup> (4H)                 | 0.2                                                                          | 0.0003                       |
| DCB             | 2.0                                                        | N.D. <sup>g</sup>       | N.D. <sup>g</sup>                      | 0                                                                            | 0                            |
| MeCN            | 0                                                          | 2.06                    | 1070 (3H)                              | 2140                                                                         | 3.96                         |
| MeCN            | 0.5                                                        | 2.06                    | 492.86 (3H)                            | 985.7                                                                        | 1.83                         |
| MeCN            | 1.0                                                        | 2.06                    | 373.95 (3H)                            | 747.9                                                                        | 1.39                         |
| MeCN            | 1.5                                                        | 2.06                    | 263.75 (3H)                            | 527.5                                                                        | 0.98                         |
| MeCN            | 2.0                                                        | 2.06                    | 152.85 (3H)                            | 305.7                                                                        | 0.57                         |

<sup>a</sup> Standard conditions: A biphasic solution containing organic solvent and  $\text{D}_2\text{O}$  (2 mL; 1:1, v/v) in the absence or presence of various concentrations of  $(\text{NH}_4)_2\text{SO}_4$  (0.5–2.0 M) was vigorously stirred overnight. For quantitative  $^1\text{H}$  NMR measurements, 540  $\mu\text{L}$  of the  $\text{D}_2\text{O}$ -rich phase was collected, 60  $\mu\text{L}$  of 0.1 M 4,4-dimethyl-4-silapentane-1-sulfonic acid (DSS)  $\text{D}_2\text{O}$ -solution was added as a standard (see Fig. S3). <sup>b</sup> Chemical shift(s) of the organic solvent. <sup>c</sup> Integration values of the organic-solvent signals (with the indicated number of protons) normalized to DSS (6  $\mu\text{mol}$ ). <sup>d</sup> (6  $\mu\text{mol}$ )  $\times$  (Integration) / (Number of H). <sup>e</sup> Concentration was calculated based on the sampled  $\text{D}_2\text{O}$ -rich phase volume (540  $\mu\text{L}$ ) prior to DSS addition. <sup>f</sup> Sum of signals. <sup>g</sup> N.D. = not detected.

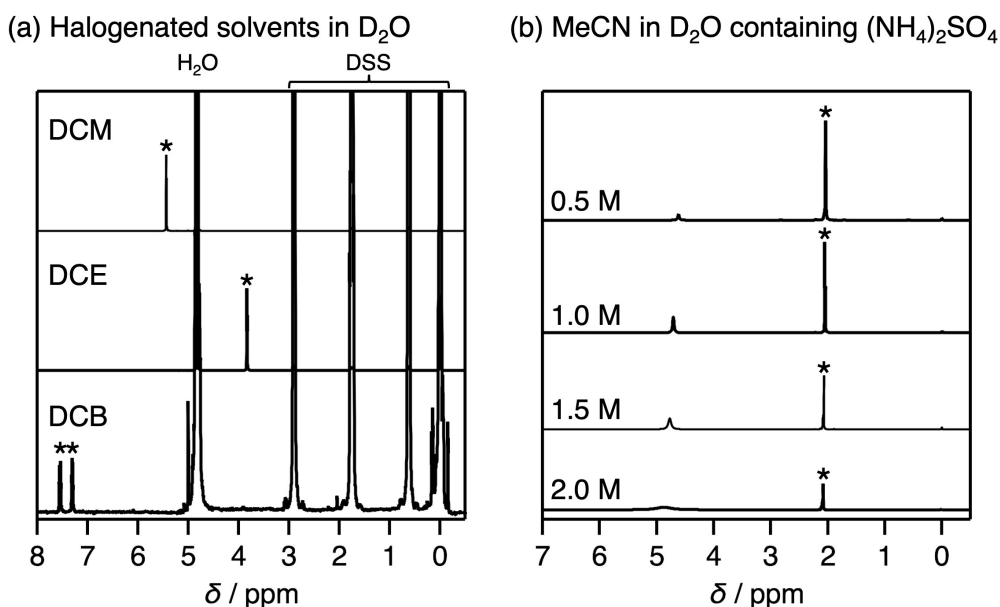

**Fig. S3**  $^1\text{H}$  NMR spectra of  $\text{D}_2\text{O}$ -rich phase: A biphasic solution containing organic solvent (a) halogenated solvents and (b) MeCN, and  $\text{D}_2\text{O}$  (2 mL; 1:1, v/v) in the absence or presence of various concentrations of  $(\text{NH}_4)_2\text{SO}_4$  (0.5–2.0 M) was vigorously stirred overnight. For the  $^1\text{H}$  NMR measurement, 4,4-dimethyl-4-silapentane-1-sulfonic acid (DSS; 6.0  $\mu\text{mol}$ ) was added to  $\text{D}_2\text{O}$ -rich phase as an internal standard. The symbols “\*” indicate signals that arise from the organic solvent.

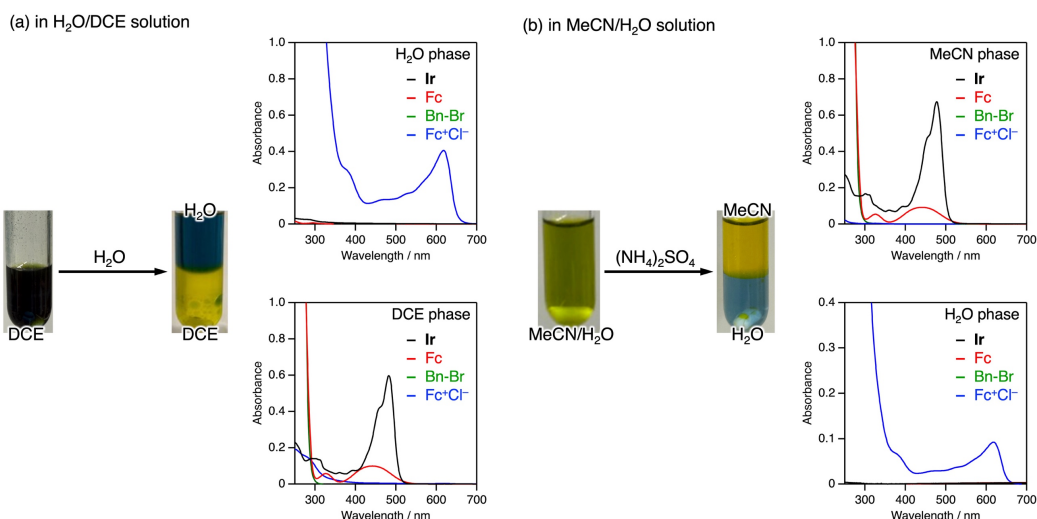

**Fig. S4** Photographs and UV-vis absorption spectra of aqueous and DCE or MeCN phases containing **Ir**, **Fc**, **Bn-Br**, and **Fc<sup>+</sup>Cl<sup>-</sup>** in a (a)  $\text{H}_2\text{O}/\text{DCE}$  and (b)  $\text{MeCN}/\text{H}_2\text{O}$  in the absence and presence of  $(\text{NH}_4)_2\text{SO}_4$  (2 M for 1 mL  $\text{H}_2\text{O}$ ).

**Table S2** Partition coefficients of each component<sup>a</sup>

| Solution                           | $C_{\text{H}_2\text{O}}/C_{\text{Org}}$ |                    |                    |                                     |                                       |
|------------------------------------|-----------------------------------------|--------------------|--------------------|-------------------------------------|---------------------------------------|
|                                    | <b>Fc</b>                               | <b>Ir</b>          | <b>Bn-Br</b>       | <b>Fc<sup>+</sup>Cl<sup>-</sup></b> | <b>TBAHSO<sub>4</sub><sup>c</sup></b> |
| $\text{H}_2\text{O}/\text{DCE}$    | $2 \times 10^{-5}$                      | $1 \times 10^{-6}$ | $1 \times 10^{-6}$ | 122                                 | 0.11                                  |
| $\text{MeCN}/\text{H}_2\text{O}^b$ | $5 \times 10^{-6}$                      | $1 \times 10^{-6}$ | $1 \times 10^{-6}$ | 54                                  | ~0                                    |

<sup>a</sup> Estimation based on the absorption spectra of each solution phase of their biphasic solution. <sup>b</sup> In the presence of 2 M  $(\text{NH}_4)_2\text{SO}_4$ . <sup>c</sup> Estimation based on the  $^1\text{H}$  NMR spectra of  $\text{D}_2\text{O}$  phase (see Fig. S5).

**Table S3** Bulk organic-phase properties and biphasic parameters of the solvent systems, along with photochemical **Fc<sup>+</sup>** formation

| Entry | Solution                         | Organic-phase properties |                                             | Biphasic parameters                           |              | Generated <b>Fc<sup>+</sup></b> / $\mu\text{mol}^c$ |
|-------|----------------------------------|--------------------------|---------------------------------------------|-----------------------------------------------|--------------|-----------------------------------------------------|
|       |                                  | $\mu$ / $\text{mPa s}^a$ | $D$ / $10^{-5} \text{ cm}^2 \text{ s}^{-1}$ | $[(\text{NH}_4)_2\text{SO}_4]$ / $\text{M}^b$ | Miscibility  |                                                     |
| 1     | $\text{H}_2\text{O}/\text{DCE}$  | 0.78                     | 1.0                                         | 0                                             | Biphase      | 1.38                                                |
| 2     | DCE                              | 0.78                     | 1.0                                         | –                                             | Single phase | 0                                                   |
| 3     | $\text{H}_2\text{O}/\text{MeCN}$ | 0.87 <sup>d</sup>        | 0.8 <sup>e</sup>                            | 0                                             | Single phase | 0                                                   |
| 4     | $\text{H}_2\text{O}/\text{MeCN}$ | 0.34 <sup>f</sup>        | 2.8 <sup>f</sup>                            | 0.5                                           | Biphase      | 0.13                                                |
| 5     | $\text{H}_2\text{O}/\text{MeCN}$ | 0.34 <sup>f</sup>        | 2.8 <sup>f</sup>                            | 1.0                                           | Biphase      | 0.17                                                |
| 6     | $\text{H}_2\text{O}/\text{MeCN}$ | 0.34 <sup>f</sup>        | 2.8 <sup>f</sup>                            | 1.5                                           | Biphase      | 0.22                                                |
| 7     | $\text{H}_2\text{O}/\text{MeCN}$ | 0.34 <sup>f</sup>        | 2.8 <sup>f</sup>                            | 2.0                                           | Biphase      | 0.30                                                |
| 8     | $\text{H}_2\text{O}/\text{DCM}$  | 0.41                     | 2.4                                         | 0                                             | Biphase      | 1.69                                                |
| 9     | $\text{H}_2\text{O}/\text{DCB}$  | 1.32                     | 0.4                                         | 0                                             | Biphase      | 1.17                                                |
| 10    | $\text{H}_2\text{O}/\text{DCM}$  | 0.41                     | 2.4                                         | 2.0                                           | Biphase      | 1.69                                                |
| 11    | $\text{H}_2\text{O}/\text{DCE}$  | 0.78                     | 1.0                                         | 2.0                                           | Biphase      | 2.17                                                |
| 12    | $\text{H}_2\text{O}/\text{DCB}$  | 1.32                     | 0.4                                         | 2.0                                           | Biphase      | 1.47                                                |

<sup>a</sup> at 25°C. <sup>b</sup> Additive to aqueous phase. <sup>c</sup> Standard conditions: **Fc** (5.0 mM), **Ir** (0.05 mM), and **Bn-Br** (50 mM) in a  $\text{H}_2\text{O}/\text{organic}$  solution (2 mL, 1:1, v/v) under visible light irradiation ( $\lambda = 470 \text{ nm}$ , 60 min). For entries 3–7, **TBAHSO<sub>4</sub>** (5.0 mM) was added to the organic phase unless otherwise noted. <sup>d</sup> ref. <sup>e</sup> In mixed solution  $\text{MeCN}/\text{H}_2\text{O}$  (1:1, v/v). <sup>f</sup> In pure MeCN solution.

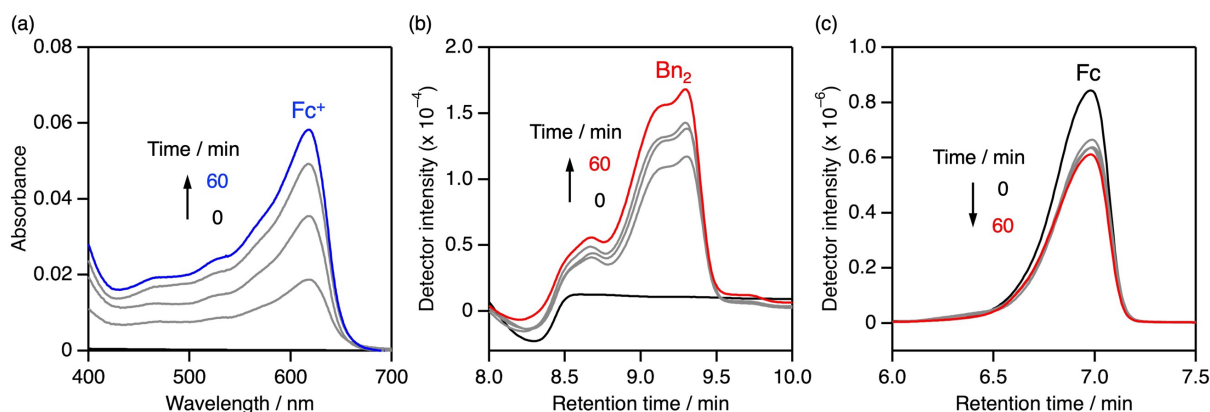

**Fig. S5** (a) UV-vis absorption spectra of the aqueous phase for  $\text{Fc}^+$  formation, and HPLC chromatograms of the DCE solution phase in the region of (b)  $\text{Bn}_2$  formation and (c)  $\text{Fc}$  consumption.

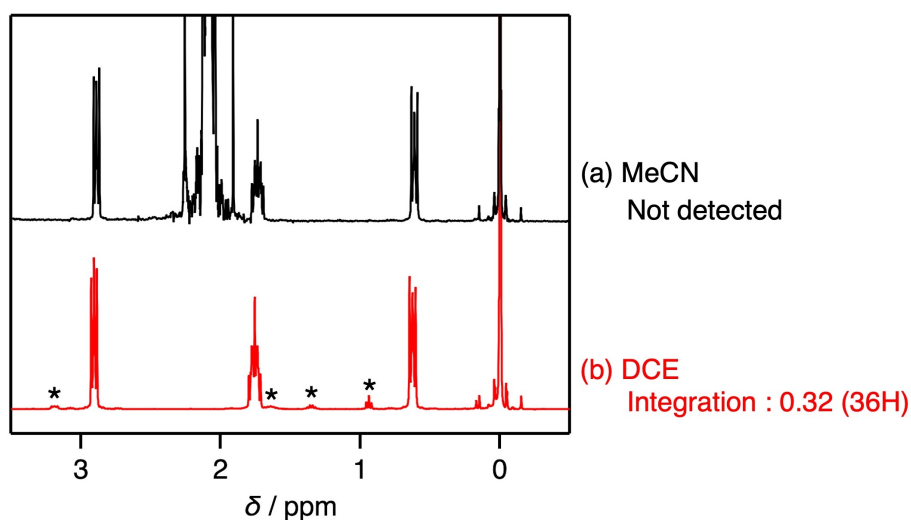

**Fig. S6**  $^1\text{H}$  NMR spectra of  $\text{D}_2\text{O}$ -rich phase for estimating partition coefficients of  $\text{TBAHSO}_4$ : A biphasic solution containing (a)  $\text{D}_2\text{O}/\text{DCE}$  and (b)  $\text{MeCN}/\text{D}_2\text{O}$  salting-out system ( $2.0 \text{ M } (\text{NH}_4)_2\text{SO}_4$ ) ( $2 \text{ mL}; 1:1, v/v$ ) in the presence of  $\text{TBAHSO}_4$  ( $1.0 \text{ mM}$ ) was vigorously stirred 10 min. For the  $^1\text{H}$  NMR measurement, DSS ( $6.0 \mu\text{mol}$ ) was added to  $\text{D}_2\text{O}$ -rich phase as an internal standard (see Table S1). The symbols “\*” indicate signals that arise from  $\text{TBA}^+$ . Partition coefficients of  $\text{TBAHSO}_4$  were estimated as follows:  $C_{\text{H}_2\text{O}}/C_{\text{DCE}} = 0.11$  and  $C_{\text{H}_2\text{O}}/C_{\text{MeCN}} \sim 0$ .

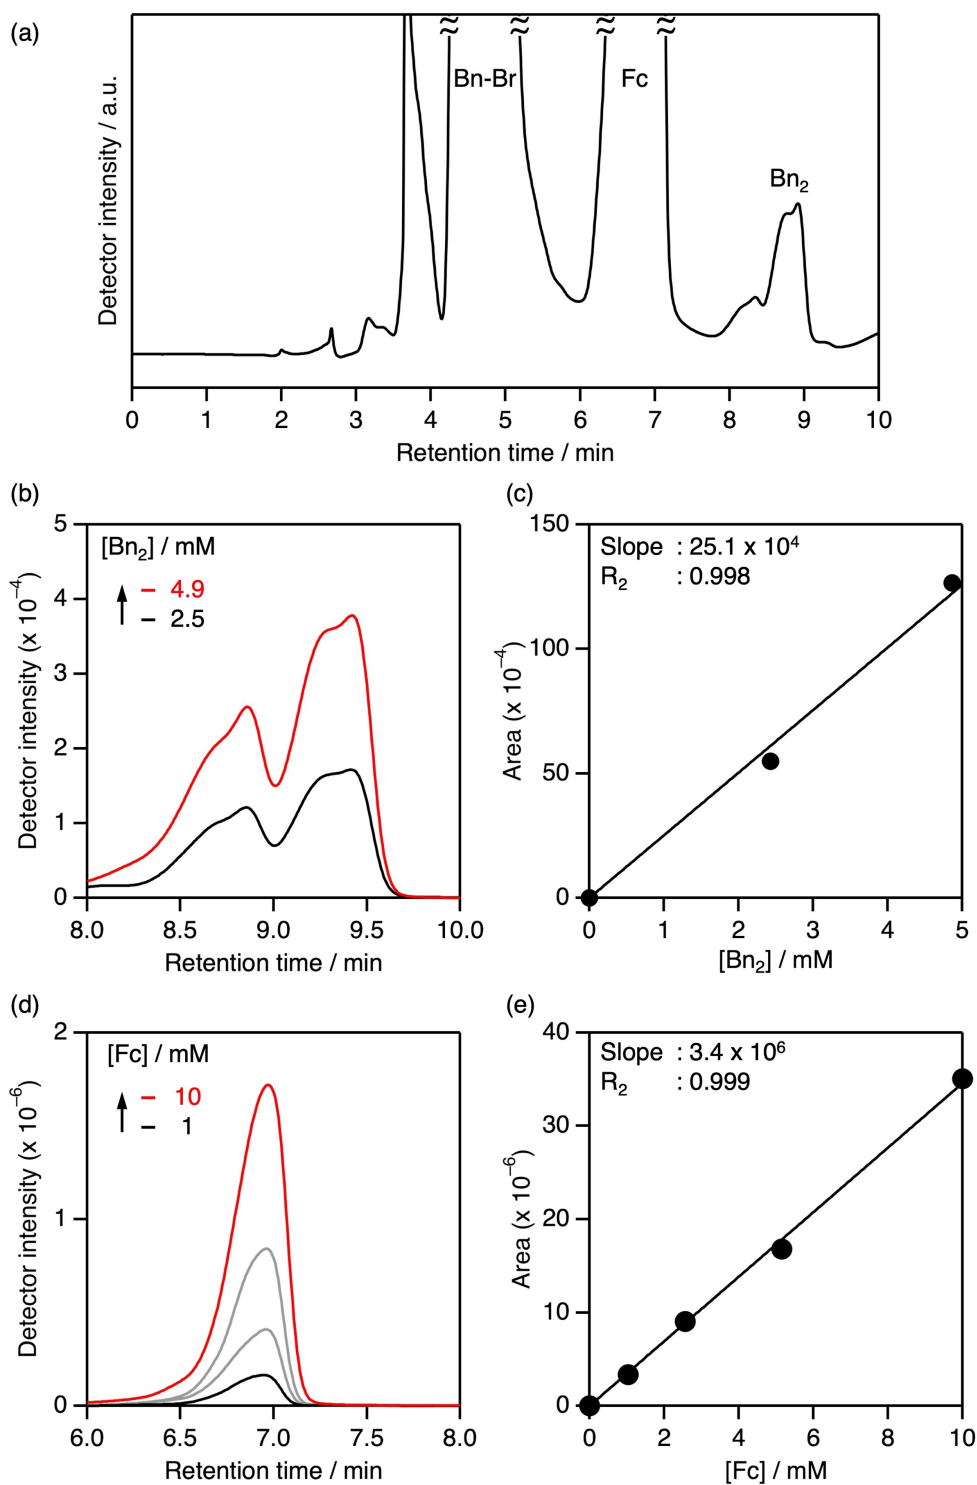

**Fig. S7** (a) HPLC chromatograms of DCE solution containing Fc, Bn-Br, and Bn<sub>2</sub>, and HPLC chromatograms and calibration curves of DCE solutions containing various concentrations of (b,c) Bn<sub>2</sub> and (d,e) Fc.

## References

1. S. Takizawa, N. Ikuta, F. Zeng, S. Komaru, S. Sebata and S. Murata, *Inorg. Chem.*, 2016, **55**, 8723-8735.
2. S. Sebata, S. Takizawa, N. Ikuta and S. Murata, *Dalton Trans.*, 2019, **48**, 14914-14925.
3. R. Breuer and M. Schmittl, *Organometallics*, 2012, **31**, 1870-1878.
4. A. Singh, D. R. Chowdhury and A. Paul, *Analyst*, 2014, **139**, 5747-5754.
5. J. P. Hurvois and C. Moinet, *J. Organomet. Chem.*, 2005, **690**, 1829-1839.
6. G. Zotti, G. Schiavon, S. Zecchin and D. Favretto, *J. Electroanal. Chem.*, 1998, **456**, 217-221.
7. H. Boaz and G. K. Rollefson, *J. Am. Chem. Soc.*, 1950, **72**, 3435-3443.
8. Y. Marcus, *The Properties of Solvents*, Wiley, Chichester, 1998.
9. M. Ansari and S. P. Singh, *Res. J. Chem. Sci.*, 2022, **12**, 67-69.
